# Supplementary material for: High-mobility group box 1 protein antagonizes the immunosuppressive capacity and therapeutic effect of mesenchymal stem cells in acute kidney injury
Source: PubMed Central journal article supplement (PMC7169035; doi:10.1186/s12967-020-02334-8), 2020-04-20

**Figure S1**

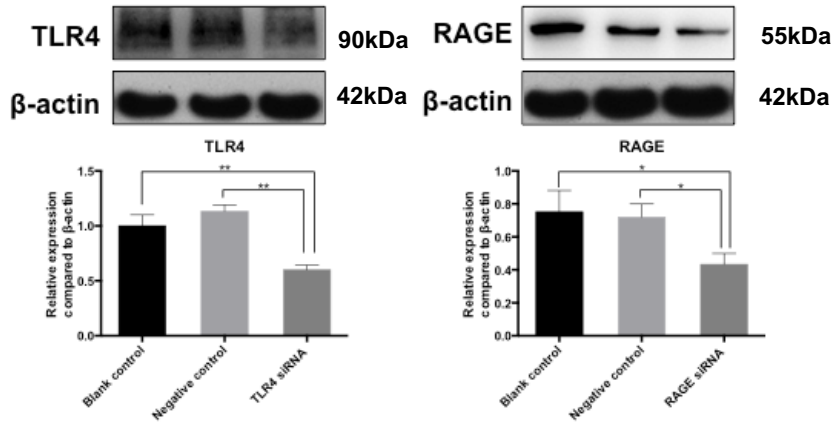

Supplement: 12967_2020_2334_MOESM1_ESM.pdf [file 12967_2020_2334_MOESM1_ESM.pdf]
