# Supplementary material for: High-mobility group box 1 protein antagonizes the immunosuppressive capacity and therapeutic effect of mesenchymal stem cells in acute kidney injury
Source: PubMed Central journal article supplement (PMC7169035; doi:10.1186/s12967-020-02334-8), 2020-04-20
Supplement: 12967_2020_2334_MOESM2_ESM.pdf [file 12967_2020_2334_MOESM2_ESM.pdf]

**Table S1:** Primers used in qRT-PCR.

| Genes          | Forward primer         | Reverse primer           |
|----------------|------------------------|--------------------------|
| HMGB1          | TGGGCGACTCTGTGCCTC     | GCCTCTCGGCTTTTTAGGATC    |
| iNOS           | CAGCTGGGCTGTACAAACCTT  | CATTGGAAGTGAAGCGTTTCG    |
| TNF- $\alpha$  | TCTTCTCATTCCCTGCTTGTGG | GGTCTGGGCCATAGAACTGA     |
| IL-1 $\beta$   | TGTAATGAAAGACGGCACACC  | TCTTCTTTGGGTATTGCTTGG    |
| IL-6           | GATGGATGCTACCAAACCTGGA | CCAGGTAGCTATGGTACTCCAGAA |
| CCL2           | TCTCTCTTCCTCCACCACCATG | GCGTTAACTGCATCTGGCTGA    |
| CCL5           | TTTCTACACCAGCAGCAAGTGC | CCTTCGTGTGACAAACACGAC    |
| CXCL9          | AGTGTGGAGTTCGAGGAACCTT | TGCAGGAGCATCGTGCATT      |
| CXCL10         | TAGCTCAGGCTCGTCAGTTCT  | GATGGTGGTTAAGTTCGTGCT    |
| $\beta$ -actin | CCACGAGCGGTTCCGATG     | GCCACAGGATTCCATACCCA     |
